# Supplementary material for: Listeria monocytogenes requires cellular respiration for NAD+ regeneration and pathogenesis
Source: eLife. 2022 Apr 5;11:e75424. doi: 10.7554/eLife.75424 (PMC9094743; doi:10.7554/eLife.75424)
Supplement: Figure 1—figure supplement 1—source data 1. [file elife-75424-fig1-figsupp1-data1.xlsx]

## Sheet: Figure 1-figure supplement 1
Source data for Figure 1-figure supplement 1A
Broth growth curve-Anaerobic
	Time (hours)	wildtype			ΔQC			ΔQC/fmnb			Δfmnb
	0	0.05	0.05	0.05	0.05	0.05	0.05	0.05	0.05	0.05	0.05	0.05	0.05
	1	0.12	0.13	0.13	0.12	0.13	0.14	0.12	0.11	0.12	0.16	0.13	0.13
	2	0.29	0.28	0.32	0.28	0.26	0.27	0.25	0.23	0.22	0.28	0.3	0.29
	3	0.73	0.74	0.67	0.61	0.69	0.67	0.47	0.53	0.52	0.76	0.63	0.66
	4	1.06	1.06	1.08	0.99	0.95	1.06	0.82	0.94	0.89	1.14	1.1	1.12
	5	1.07	1.08	1.12	1.07	1.07	1.1	1.06	0.99	1.02	1.15	1.11	1.12
	6	1.09	1.1	1.11	1.07	1.08	1.08	1.03	1	1.11	1.1	1.12	1.11
	7	1.16	1.14	1.07	1.07	1.02	1.05	1.02	0.99	0.98	1.08	1.1	1.08
	8	1.15	1.16	1.12	1.06	1.07	1.06	1.05	1.06	1.03	1.1	1.12	1.09
	24	0.94	0.95	0.98	1.01	0.91	1.01	1.01	0.91	1.01	0.92	1.02	0.95
