# Supplementary material for: Listeria monocytogenes requires cellular respiration for NAD+ regeneration and pathogenesis
Source: eLife. 2022 Apr 5;11:e75424. doi: 10.7554/eLife.75424 (PMC9094743; doi:10.7554/eLife.75424)
Supplement: Figure 1—figure supplement 1—source data 2. [file elife-75424-fig1-figsupp1-data2.xlsx]

## Sheet: Figure 1-figure supplement 2
Source data for Figure 1-figure supplement 1B
Broth growth curve- Anaerobic + fumarate or Fe3+
	Time (hours)	wildtype			Δfmnb			wildtype + Fe3+			Δfmnb + Fe3+			wildtype + fum			Δfmnb + fum
	0	0.05	0.05	0.05	0.05	0.05	0.05	0.05	0.05	0.05	0.05	0.05	0.05	0.05	0.05	0.05	0.05	0.05	0.05
	1	0.12	0.13	0.13	0.16	0.13	0.13	0.14	0.15	0.14	0.12	0.14	0.12	0.14	0.12	0.12	0.12	0.14	0.13
	2	0.29	0.28	0.32	0.28	0.3	0.29	0.33	0.37	0.4	0.3	0.26	0.25	0.3	0.28	0.27	0.29	0.27	0.26
	3	0.73	0.74	0.67	0.76	0.63	0.66	0.82	0.86	0.84	0.59	0.61	0.63	0.75	0.74	0.73	0.57	0.61	0.48
	4	1.06	1.06	1.08	1.14	1.1	1.12	1.52	1.51	1.52	0.93	0.92	0.94	1.2	1.13	1.18	0.97	0.96	0.95
	5	1.07	1.08	1.12	1.15	1.11	1.12	1.59	1.55	1.52	0.94	0.93	0.96	1.33	1.41	1.35	1.04	1.05	1.07
	6	1.09	1.1	1.11	1.1	1.12	1.11	1.6	1.6	1.58	0.97	0.96	0.96	1.55	1.52	1.56	1.03	1.02	1.03
	7	1.16	1.14	1.07	1.08	1.1	1.08	1.6	1.62	1.65	0.97	0.95	0.97	1.58	1.6	1.63	1.06	1.05	1.05
	8	1.15	1.16	1.12	1.1	1.12	1.09	1.58	1.61	1.62	0.98	0.97	0.96	1.58	1.6	1.62	1.06	1.03	1.05
	24	0.94	0.95	0.98	0.92	1.02	0.95	1.62	1.54	1.63	0.88	0.91	0.93	1.68	1.58	1.61	0.97	0.99	1
