# Supplementary material for: Listeria monocytogenes requires cellular respiration for NAD+ regeneration and pathogenesis
Source: eLife. 2022 Apr 5;11:e75424. doi: 10.7554/eLife.75424 (PMC9094743; doi:10.7554/eLife.75424)
Supplement: Figure 1—source data 1. [file elife-75424-fig1-data1.xlsx]

## Sheet: Figure 1- source data 1
Source data for Figure 1B
Broth growth curve-Aerobic
	Time (hours)	wildtype			ΔQC			ΔQC/fmnB			ΔfmnB			wildtype (No O2)
	0	0.05	0.05	0.05	0.05	0.05	0.05	0.05	0.05	0.05	0.05	0.05	0.05	0.05	0.05	0.05
	1	0.14	0.15	0.16	0.13	0.15	0.09	0.08	0.09	0.07	0.15	0.15	0.12	0.12	0.13	0.13
	2	0.29	0.32	0.42	0.2	0.24	0.22	0.11	0.12	0.1	0.37	0.28	0.3	0.29	0.28	0.32
	3	0.63	0.71	1	0.38	0.43	0.35	0.2	0.19	0.14	0.79	0.76	0.66	0.73	0.74	0.67
	4	1.7	2	1.9	0.73	0.83	0.76	0.26	0.27	0.28	2.1	2.1	2.1	1.06	1.06	1.08
	5	3.9	3.5	4.1	1.6	1.6	1.5	0.43	0.48	0.45	3.6	3.9	3.8	1.07	1.08	1.12
	6	4	4.4	4.3	1.8	1.9	1.8	0.78	0.74	0.75	4	4.3	4.3	1.09	1.1	1.11
	7	4.4	4.4	4.5	1.8	1.9	2	1.5	1.4	1.2	4.6	4.6	4.3	1.16	1.14	1.07
	8	4.6	4.6	4.5	2	2.1	2	1.6	1.7	1.6	4.6	4.6	4.5	1.15	1.16	1.12
	9	4.5	4.6	4.6	2.1	2	2.1	1.7	1.8	1.6	4.7	4.5	4.6
	10	4.6	4.6	4.5	2.2	2.1	2.2	1.7	1.8	1.7	4.6	4.6	4.6
	24	4.3	4.4	4.4	2	2	2.1	1.5	1.6	1.6	4.5	4.4	4.4	0.94	0.95	0.98
