# Supplementary material for: Listeria monocytogenes requires cellular respiration for NAD+ regeneration and pathogenesis
Source: eLife. 2022 Apr 5;11:e75424. doi: 10.7554/eLife.75424 (PMC9094743; doi:10.7554/eLife.75424)
Supplement: Figure 1—source data 2. [file elife-75424-fig1-data2.xlsx]

## Sheet: Figure 1-source data 2
Source data for Figure 1C
Fermentation products
		Lactic			Acetic			Ethanol			Formic
Aerobic	wildtype				98.5	95.3	95.8	0.5	0.1	0.1	3	2.6	4.1
	ΔQC	51.3	53.4	54.5	49.4	44	48	0.1	0.5	0.2
	ΔQC/fmnB	95.6	95	96.7	3.4	2.4	2.7	0.6	0.5	0.6	1.4	0.4	0.6
Anaerobic	wildtype	52.51	53.98	50.5	7.09	6.13	6.75	26.63	27.47	29.1	13.78	12.42	13.64
	ΔfmnB	45.21	44.67	49.44	9.06	8.17	0	28.74	31.83	34.31	17	15.33	16.25
	ΔQC	42.25	49.09	41.88	8.94	7.54	9.28	31.93	29.06	31.91	16.88	14.31	16.93
	ΔQC/fmnB	46.6	46.43	47.06	7.69	7.58	8.9	30.64	30.92	28.76	15.07	15.08	15.28
