# Supplementary material for: Listeria monocytogenes requires cellular respiration for NAD+ regeneration and pathogenesis
Source: eLife. 2022 Apr 5;11:e75424. doi: 10.7554/eLife.75424 (PMC9094743; doi:10.7554/eLife.75424)
Supplement: Figure 2—source data 1. [file elife-75424-fig2-data1.xlsx]

## Sheet: Figure 2-source data 1
Source data for Figure 2A
Plaque assay
	wildtype	ΔQC	ΔQC/fmnB**	ΔfmnB	Δndh1/ndh2::tn**		** no plaques were observed in either of the two independent experiments performed
	87.4612	18.8959	0	94.6923	0
	112.431	11.0676	0	96.0307	0
	99.2037	19.5708		91.0117
	99.3386	27.5341		96.6999
	105.682	20.9205		108.411
	89.6733	14.3069		99.0421
	103.392	13.4971		96.6999
	96.0307	13.3621		76.9584
	96.0307	22.5402		94.3577
	107.407	11.6075		98.0383
	92.4551			111.088
	100.148			98.7075
	88.271			99.0421
	108.382			111.422
	106.627			101.05
	108.076
	102.054
	102.723
	105.734
	96.0307
	97.7037
	96.0307
	99.7113
	107.742
	122.464
	106.738
	100.046
	102.388
	99.5854
	97.4644
	97.0604
	102.211
	99.9894
	100.898
	99.2824
	94.5354
	95.3434
	98.8784
	104.231
	102.312
	96.5554
	96.3534
