# Supplementary material for: Listeria monocytogenes requires cellular respiration for NAD+ regeneration and pathogenesis
Source: eLife. 2022 Apr 5;11:e75424. doi: 10.7554/eLife.75424 (PMC9094743; doi:10.7554/eLife.75424)
Supplement: Figure 2—source data 2. [file elife-75424-fig2-data2.xlsx]

## Sheet: Figure 2-source data 2
Source data for Figure 2B
Intracellular growth in Bone-marrow derived macrophages
	Time	wildtype						ΔQC						ΔQC/fmnB						ΔfmnB
	0.5	9900	8600	8200	8900	9800	11700	9300	8400	9400	13500	12500	9900	5500	7200	5700	4500	5800	4700	11800	12600	8200	8000	7200	8200
	2	11000	10100	17200	12900	16500	16000	10200	7900	8800	20700	17300	21000	8600	5600	8000	2400	3000	3900	8600	12700	6400	8800	9100	11000
	5	157000	151000	160000	115000	230000	90000	112000	110000	85000	185000	195000	202000	5000	6900	7100	2800	5700	5100	123000	144000	148000	94000	116000	98000
	8	198000	196000	186000	249000	228000	254000	71000	79000	88000	177000	192000	196000	2600	5200	6600	2900	2300	4200	244000	159000	131000	170000	270000	143000
