# Supplementary material for: Listeria monocytogenes requires cellular respiration for NAD+ regeneration and pathogenesis
Source: eLife. 2022 Apr 5;11:e75424. doi: 10.7554/eLife.75424 (PMC9094743; doi:10.7554/eLife.75424)
Supplement: Figure 2—source data 3. [file elife-75424-fig2-data3.xlsx]

## Sheet: Figure 2-source data 3
Source data for Figure 2C
Virulence experiments
	total CFU/organ
	Spleen
	wildtype	ΔQC	ΔQC/fmnB
	6000000	3000	50
	1200000	8000	50
	6000000	9000	50
	12000000	5000	50
	33000000	2000	50
	56000000	28000	25
	57000000	20000	25
	16000000	12000	25
	56000000	10000	25
	34000000	32000	25
	Liver
	wildtype	ΔQC	ΔQC/fmnB
	2200000	4000	100
	8000000	4000	100
	3200000	20000	100
	32000000	4000	100
	62000000	6000	100
	40000000	40000	50
	32000000	70000	50
	12000000	38000	50
	72000000	100000	50
	14000000	22000	50
