# Supplementary material for: Listeria monocytogenes requires cellular respiration for NAD+ regeneration and pathogenesis
Source: eLife. 2022 Apr 5;11:e75424. doi: 10.7554/eLife.75424 (PMC9094743; doi:10.7554/eLife.75424)
Supplement: Figure 3—figure supplement 1—source data 1. [file elife-75424-fig3-figsupp1-data1.xlsx]

## Sheet: Figure 3-fig sup-source data 1
Source data for Figure 3- figure supplement 1
% wildtype swarming motility
	wildtype	ΔmenB + NOX	ΔmenB	ΔfmnB	ΔQC/fmnB + NOX	ΔQC/fmnB	ΔflaA	wildtype + NOX	ΔQC + NOX	ΔQC
	100	71.4286	71.4286	90.4762	85.7143	85.7143	47.619	90.4762	80.9524	80.9524
	100	72.7273	68.1818	100	79.1667	66.6667	50	90.9091	81.8182	72.7273
	100	76.9231	53.8462	92.3077	76.9231	69.2308	26.9231	76.9231	76.9231	69.2308
