# Supplementary material for: Listeria monocytogenes requires cellular respiration for NAD+ regeneration and pathogenesis
Source: eLife. 2022 Apr 5;11:e75424. doi: 10.7554/eLife.75424 (PMC9094743; doi:10.7554/eLife.75424)
Supplement: Figure 3—source data 1. [file elife-75424-fig3-data1.xlsx]

## Sheet: Figure 3- source data 1
Source data for Figure 3B
NAD+/NADH ratios
	wildtype	ΔQC	ΔQC/fmnB	wildtype	ΔQC	ΔQC/fmnB
	76.123	9.44617	5.63952	102.091	79.4497	88.0678
	73.3939	10.5321	6.59751	97.0756	63.164	93.0584
	68.1197	10.7661	5.30413	102.295	77.8004	111.232
