# Supplementary material for: Listeria monocytogenes requires cellular respiration for NAD+ regeneration and pathogenesis
Source: eLife. 2022 Apr 5;11:e75424. doi: 10.7554/eLife.75424 (PMC9094743; doi:10.7554/eLife.75424)
Supplement: Figure 3—source data 2. [file elife-75424-fig3-data2.xlsx]

## Sheet: Figure 3-source data 2
Source data for Figure 3C
Fermentation products
		Lactic			Acetic			Ethanol			Formic
	wildtype	-1.6	-1.5	-1.6	100.1	96.9	97.3	0.5	0.1	0.1	3	2.6	4.1
	ΔQC/fmnB	95.6	95	96.7	3.4	2.4	2.7	0.6	0.5	0.6	1.4	0.4	0.6
	ΔQC/fmnB + NOX	3.2	-0.9	-1.2	93.1	99.7	104.1	0.1	0.1	0.1	0	0.8	0.6
