# Supplementary material for: Listeria monocytogenes requires cellular respiration for NAD+ regeneration and pathogenesis
Source: eLife. 2022 Apr 5;11:e75424. doi: 10.7554/eLife.75424 (PMC9094743; doi:10.7554/eLife.75424)
Supplement: Figure 4—source data 1. [file elife-75424-fig4-data1.xlsx]

## Sheet: Figure 4-source data 1
Source data for Figure 4A
Plaque assay
	wildtype	wildtype + NOX	ΔQC	ΔQC + NOX	ΔQC/fmnB**	ΔQC/fmnB + NOX	Δndh1/ndh2::tn**	Δndh1/ndh2::tn + NOX		* no plaques were observed in the either of the two independent experiments performed
	100.989	92.3998	34.7475	90.5778	0	88.6257	0	82.8195
	96.5643	91.3587	31.1036	89.4066	0	89.4066	0	87.1624
	105.284	95.1327	22.3842	96.304		96.0437		85.5465
	90.3175	95.2629	28.5008	97.8657		101.379		81.8095
	106.845	89.9271	27.4597	107.496		90.9682		82.2135
	97.3118	97.9839	29.1667	110.081		87.2312		95.0404
	110.618	97.8495	22.4462	92.4731		91.6667		103.019
	99.7312	92.3387	31.3172	107.258		88.7097		103.928
	99.0591	92.3387	35.215	112.903		88.0376		85.3445
	93.2796	117.204	27.1505	81.7204		92.4731		85.7485
	99.9894							89.3844
	100.898							83.7426
	99.2824							88.1501
	94.5354							88.4649
	95.3434							85.6315
	98.8784							103.576
	104.231							82.0636
	102.312							84.1624
	96.5554							84.6871
	96.3534							81.9586
	102.615							82.5883
	96.3534							79.2302
	112.008							83.9525
	105.645							86.2612
	98.6764							84.0574
	102.947							91.6131
	108.089							87.3106
	114.07							114.805
	95.7058							90.6687
	96.6503							93.3971
	100.113							98.959
	102.422
	84.3722
	103.786
	96.5454
	98.4343
	98.0145
	102.842
	103.366
	100.743
	101.373
