# Supplementary material for: Listeria monocytogenes requires cellular respiration for NAD+ regeneration and pathogenesis
Source: eLife. 2022 Apr 5;11:e75424. doi: 10.7554/eLife.75424 (PMC9094743; doi:10.7554/eLife.75424)
Supplement: Figure 4—source data 2. [file elife-75424-fig4-data2.xlsx]

## Sheet: Figure 4-source data 2
Source data for Figure 4B
Intracellular growth in Bone-marrow derived macrophages
	Time	WT						ΔQC/fmnB						ΔQC/fmnB + NOX
	0.5	9000	9200	8500	9700	8200	10400	5500	7200	5700	4500	5800	4700	4900	4700	6700	6100	6500	4800
	2	7200	5500	6800	16200	16100	15100	8600	5600	8000	2400	3000	3900	10200	9700	7600	8900	8400	8000
	5	99000	109000	140000	245000	251000	263000	5000	6900	7100	2800	5700	5100	179000	147000	149000	201000	157000	150000
	8	164000	228000	173000	287000	341000	253000	2600	5200	6600	2900	2300	4200	314000	300000	355000	291000	401000	343000
