# Supplementary material for: Listeria monocytogenes requires cellular respiration for NAD+ regeneration and pathogenesis
Source: eLife. 2022 Apr 5;11:e75424. doi: 10.7554/eLife.75424 (PMC9094743; doi:10.7554/eLife.75424)
Supplement: Figure 4—source data 3. [file elife-75424-fig4-data3.xlsx]

## Sheet: Figure 4- source data 3
Source data for Figure 4C
Virulence experiments	total CFU/organ
	Spleen
	wildtype	wildtype + NOX	ΔQC	ΔQC + NOX	ΔQC/fmnB	ΔQC/fmnB + NOX
	6000000	1200000	3000	500000	50	3000000
	1200000	26000000	8000	1100000	50	1700000
	6000000	6000000	9000	2800000	50	3900000
	12000000	24000000	5000	4100000	50	2100000
	33000000	26000000	2000	600000	50	3100000
	56000000	12000000	28000	450000	25	1200000
	57000000	16000000	20000	500000	25	600000
	16000000	4000000	12000	200000	25	800000
	56000000	4000000	10000	150000	25	200000
	34000000		32000	130000	25	500000
	Liver
	wildtype	wildtype + NOX	ΔQC	ΔQC + NOX	ΔQC/fmnB	ΔQC/fmnB + NOX
	2200000	6400000	4000	80000	100	80000
	8000000	8000000	4000	180000	100	120000
	3200000	8000000	20000	240000	100	60000
	32000000	12000000	4000	160000	100	140000
	62000000	12000000	6000	100000	100	120000
	40000000	34000000	40000	80000	50	80000
	32000000	40000000	70000	1800000	50	200000
	12000000	8000000	38000	36000	50	520000
	72000000	20000000	100000	24000	50	40000
	14000000		22000	40000	50	180000
