# Supplementary material for: Listeria monocytogenes requires cellular respiration for NAD+ regeneration and pathogenesis
Source: eLife. 2022 Apr 5;11:e75424. doi: 10.7554/eLife.75424 (PMC9094743; doi:10.7554/eLife.75424)
Supplement: Figure 5—source data 1. [file elife-75424-fig5-data1.xlsx]

## Sheet: Figure 5- source data 1
Source data for Figure 5B
Plaque assay
	wildtype	ΔmenB*	ΔmenB + NOX		* no plaques were observed in the either of the two independent experiments performed
	97.2757	0	97.4231
	91.9698	0	105.382
	105.972		92.5593
	93.8858		81.8
	103.908		94.0332
	84.1582		98.16
	102.729		90.938
	85.7795		68.9773
	95.0649		85.6321
	101.697		93.0015
	103.466		87.4008
	102.434		102.287
	104.35		94.9175
	92.2645		101.55
	89.022		112.457
	95.0649		96.3914
	104.792		92.1171
	111.867		87.6955
	111.13		87.4008
	103.761		98.3074
	99.1917		92.1171
	91.8224		108.035
	99.9287		98.6022
	104.792		99.4865
	101.845		98.897
	112.014		94.1806
	102.582		101.845
	116.436		88.1377
	101.108		68.9773
	101.255		95.6544
	88.4325		100.518
			99.4865
			85.3373
			104.94
			93.1489
			86.2217
			87.9903
			97.4231
			94.328
			106.709
			95.2123
			90.2011
			93.591
			100.96
			98.0126
			93.4436
			97.5705
			98.3074
			90.938
			103.171
			98.3074
			100.666
			98.897
			95.9492
			78.1153
			96.3914
			86.2217
			83.4213
			95.5071
			91.3802
			102.582
			93.0015
