# Supplementary material for: Listeria monocytogenes requires cellular respiration for NAD+ regeneration and pathogenesis
Source: eLife. 2022 Apr 5;11:e75424. doi: 10.7554/eLife.75424 (PMC9094743; doi:10.7554/eLife.75424)
Supplement: Figure 5—source data 2. [file elife-75424-fig5-data2.xlsx]

## Sheet: Figure 5- source data 2
Source data for Figure 5C
Virulence experiments
	total CFU/organ
	Spleen
	wildtype	∆menB	∆menB + NOX
	13000000	1275	500000
	8000000	250	310000
	7000000	75	280000
	33000000	25	200000
	19000000	175	120000
	56000000	500	250000
	57000000	150	600000
	16000000	225	160000
	56000000	320	110000
	34000000	75	40000
	Liver
	wildtype	∆menB	∆menB + NOX
	8400000	200	100000
	11600000	100	1140000
	5600000	150	16000
	72000000	50	22000
	44000000	50	18000
	40000000	100	12000
	74000000	50	20000
	12000000	50	14000
	72000000	175	26000
	14000000	125	18000
