# Supplementary material for: Listeria monocytogenes requires cellular respiration for NAD+ regeneration and pathogenesis
Source: eLife. 2022 Apr 5;11:e75424. doi: 10.7554/eLife.75424 (PMC9094743; doi:10.7554/eLife.75424)
Supplement: Figure 5—source data 3. [file elife-75424-fig5-data3.xlsx]

## Sheet: Figure 5- source data 3
Source data for Figure 5D
Intracellular bacteriolysis relative to wild-type
	wildtype	wildtype + NOX	ΔglmR	ΔglmR + NOX	ΔmenB	ΔmenB + NOX	Δhly
	1.34019	0.560042	9.49239	11.427	9.61385	0.87745	0.15081
	0.86898	0.984047	7.53052	9.65658	6.23685	1.93208	0.163967
	0.790834	1.33459	8.71557	9.91475	4.72247	1.53395	0.288984
