# Supplementary figures and images for: Listeria monocytogenes requires cellular respiration for NAD+ regeneration and pathogenesis
Source: eLife journal article supplement (doi:10.7554/elife.75424), 2022-04-05

**A**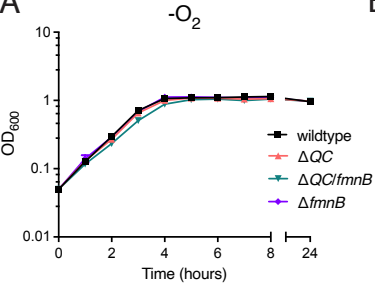**B**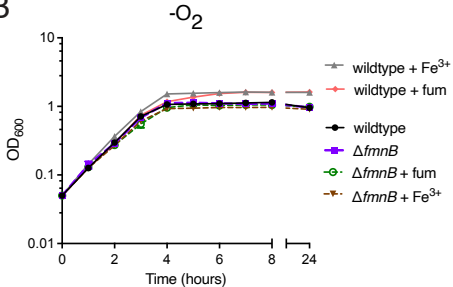

Supplement: supp [file elife-75424-supp-v1.zip]

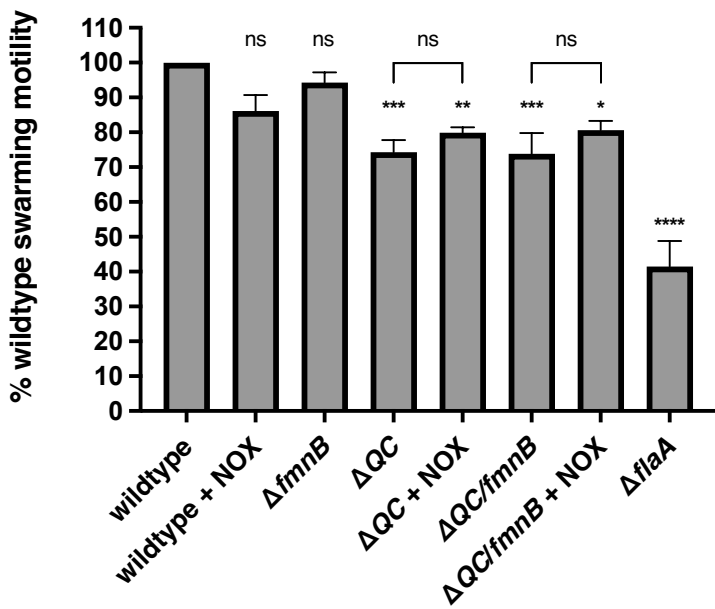

Supplement: supp [file elife-75424-supp-v1.zip]
